# Supplementary material for: Differential long non-coding RNA expression profiles in the peripheral blood and CD4+ T cells of patients with active rheumatoid arthritis
Source: PubMed Central journal article supplement — Exp Ther Med. 2020 Apr 23;20(1):461–71. doi: 10.3892/etm.2020.8681 (PMC7271723; doi:10.3892/etm.2020.8681), 2020-04-23
Supplement: Supplementary_Data.pdf [file Supplementary_Data.pdf]

Table SI. Overview of the 21 target long non-coding RNAs.

| A, Upregulated  |               |             |             |             |
|-----------------|---------------|-------------|-------------|-------------|
| Sequence name   | Gene symbol   | P-value     | FDR         | Fold change |
| ENST00000416119 | RP11-240D10.4 | 0.008109918 | 0.692834233 | 59.0010735  |
| ENST00000563752 | SLC25A3P1     | 0.005376879 | 0.692834233 | 164.3631415 |
| ENST00000572491 | RP11-506D12.5 | 0.009958382 | 0.692834233 | 47.0654375  |
| ENST00000553045 | RP1-197B17.3  | 0.002734236 | 0.682420355 | 45.5883298  |
| ENST00000494340 | RP11-260O18.1 | 0.03528798  | 0.692834233 | 885.5066309 |
| ENST00000418741 | LINC00419     | 0.023943149 | 0.692834233 | 201.1309165 |
| ENST00000569543 | CTC-297N7.1   | 0.026193082 | 0.692834233 | 111.8615604 |
| ENST00000420096 | Z83851.4      | 0.011814023 | 0.692834233 | 35.0298244  |
| ENST00000444038 | RP1-8B1.4     | 0.005948319 | 0.692834233 | 59.6405125  |
| NR_038238       | LOC151484     | 0.009854157 | 0.692834233 | 78.9519531  |
| NR_039985       | FLJ22447      | 0.015974968 | 0.692834233 | 82.8247851  |

## B, Downregulated

| Sequence name   | Gene symbol   | P-value     | FDR         | Fold change |
|-----------------|---------------|-------------|-------------|-------------|
| ENST00000510137 | CTD-2263F21.1 | 0.012314411 | 0.692834233 | 15.4355876  |
| ENST00000570118 | RP11-243A14.3 | 0.033197101 | 0.692834233 | 69.1838071  |
| NR_024028       | LINC00112     | 0.02576439  | 0.692834233 | 10.1324114  |
| TCONS_00021993  | XLOC_010596   | 0.009463727 | 0.692834233 | 16.0976964  |
| uc021xin.1      | BX648496      | 0.004535082 | 0.692834233 | 10.6498854  |
| TCONS_00008217  | XLOC_003679   | 0.016412496 | 0.692834233 | 15.8558284  |
| ENST00000420941 | RP11-223P11.2 | 0.037282424 | 0.692834233 | 10.4429268  |
| NR_026661       | FAM222A-AS1   | 0.033409359 | 0.692834233 | 14.8852062  |
| NR_040002       | LOC255654     | 0.043275304 | 0.692834233 | 17.1062355  |
| NR_027148       | NR_027148     | 0.048422339 | 0.692834233 | 14.7681618  |

FDR, false discovery rate.

Table SII. List of primers used for real-time quantitative PCR.

| Gene name       | Bidirectional quantitative PCR primer                              | Annealing temperature (°C) | Product length (bp) |
|-----------------|--------------------------------------------------------------------|----------------------------|---------------------|
| GAPDH (HUMAN)   | F: 5'-GGGAAACTGTGGCGTGAT-3'<br>R: 5'-GAGTGGGTGTCGCTGTTGA-3'        | 60                         | 299                 |
| β-actin (HUMAN) | F: 5'-GTGGCCGAGGACTTTGATTG-3'<br>R: 5' CCTGTAACAACGCATCTCATATT-3'  | 60                         | 73                  |
| ENST00000416119 | F: 5'-ACCCCTCTTACAAGGTCCCTC-3'<br>R: 5'-TGAATGGCCTCGAACTTTAGC-3'   | 60                         | 132                 |
| ENST00000563752 | F: 5'-GCCAATTTCTTTCAAATGCTGT-3'<br>R: 5'-CAGAGGCTTGATGCTTTGCTT-3'  | 60                         | 112                 |
| ENST00000572491 | F: 5'-ACCCGTTTCAGCAGCTTCCAT-3'<br>R: 5'-TTCACCTTTCCCACAGCCTCC-3'   | 60                         | 134                 |
| ENST00000553045 | F: 5'-TGATGGTCCAAGGTGAACAAG-3'<br>R: 5'-CAGGAGAACGAGGATGGTAGAA-3'  | 60                         | 250                 |
| ENST00000494340 | F: 5'-CCAAAGTCCAGCTACCACAATA-3'<br>R: 5'-TCCCGTGACCATAGGAAGATA-3'  | 60                         | 172                 |
| ENST00000418741 | F: 5'-CTACATGGACATGGGAAGGAC-3'<br>R: 5'-AGGAATTGGCAGAAATGAGAT-3'   | 60                         | 152                 |
| ENST00000569543 | F: 5'-ACGACATGGACGGACACTTTAGG-3'<br>R: 5'-AGTTGGGCAGGGCTCACTCAC-3' | 60                         | 164                 |
| ENST00000492209 | F: 5'-GCTTAATAGGGAAGGAAGGTGG-3'<br>R: 5'-AGGATTGCTGCTGTAATGCTGT-3' | 60                         | 64                  |
| ENST00000420096 | F: 5'-AGTGGTGGTGCTGGGATTTGTC-3'<br>R: 5'-ATTCACGGCTCCTGCTGCTTT-3'  | 60                         | 294                 |
| ENST00000444038 | F: 5'-TACTGGATAAGCGAGCACCT-3'<br>R: 5'-ATTTCTGATGCCTTCATTTGG-3'    | 60                         | 125                 |
| NR_038238       | F: 5'-TTTTGACCTTGGCAATGTTCC-3'<br>R: 5'-TGACCCTTGGTGGCTGTTTAT-3'   | 60                         | 97                  |
| NR_039985       | F: 5'-CCTGATGAAATGCCTGGTCTAA-3'<br>R: 5'-CTGTGGGATTGGGTGAAGAAC-3'  | 60                         | 129                 |
| ENST00000510137 | F: 5'-ATTAGCCAGGAGGAGGACAA-3'<br>R: 5'-TGACTAGGTGGATCTTCCGGTG-3'   | 60                         | 135                 |
| ENST00000570118 | F: 5' CAAACAGAGCACCGATGGATT-3'<br>R: 5'-CGTTCCTTGGCACTGGGATTAC-3'  | 60                         | 123                 |
| NR_024028       | F: 5'-AGGGTCTCGACGGTGAAGAAG-3'<br>R: 5'-TCAGAACCAATGATGGGAACG-3'   | 60                         | 145                 |
| TCONS_00021993  | F: 5'-ATCACAGGATCGGATGACACG-3'<br>R: 5'-GCTCAATGAAGGTAAGGGCAGTA-3' | 60                         | 177                 |
| uc021xin.1      | F: 5'-ACGAAGTCTCCCGTTTCAAGT-3'<br>R: 5'-CTGAAGTTTCTGCGTGTCTG-3'    | 60                         | 140                 |
| TCONS_00008217  | F: 5'-TTCACCTCCTCCATTTAACTTCT-3'<br>R: 5'-TCGGAAGTCTTAGTTGGAGCA-3' | 60                         | 141                 |
| ENST00000420941 | F: 5'-GGGGAAGAAAGTGCTTACTA-3'<br>R: 5'-CTGTTACGCTGGATGATATTGA-3'   | 60                         | 156                 |
| NR_026661       | F: 5'-CTCTTACGCACAGTCGGATGGT-3'<br>R: 5'-GCATCCCTCCTTCCCTCTTTT-3'  | 60                         | 233                 |
| NR_040002       | F: 5'-AGATTGACCTGGAGGTGAGCC-3'<br>R: 5'-CCTGATGCCATATCATTTCCTAA-3' | 60                         | 68                  |
| NR_027148       | F: 5'-CAACTGACCTGCCTTCTTCTG-3'<br>R: 5'-TAACATTGTTTCTGCCCTCACG-3'  | 60                         | 214                 |
| CCL19           | F: 5'-GGCACCAATGATGCTGAAGAC-3'<br>R: 5'-TCACAATGCTTGACTCGGACTC-3'  | 60                         | 281                 |

F, forward; R, reverse; CCL19, C-C motif chemokine ligand 19.
